# Supplementary material for: STAT3 determines IL-4 signalling outcomes in naïve T cells
Source: PubMed Central journal article supplement (PMC8131749; doi:10.1038/s41598-021-89860-7), 2021-05-18
Supplement: 41598_2021_89860_MOESM1_ESM.pdf [file 41598_2021_89860_MOESM1_ESM.pdf]

## **SUPPLEMENTARY FILES**

### **STAT3 determines IL-4 signalling outcomes in naïve T cells**

Lachlan P. Deimel<sup>1,2</sup>, Zheyi Li<sup>1</sup>, Sreeja Roy<sup>1,3</sup> and Charani Ranasinghe<sup>1\*</sup>

Running title: IL-4R $\alpha$  and STAT3/STAT6 regulation on T cells

\*Correspondence: [charani.ranasinghe@anu.edu.au](mailto:charani.ranasinghe@anu.edu.au)

Telephone: +61 2 6125 4706

<sup>1</sup> Molecular Mucosal Vaccine Immunology Group, Department of Immunology and Infectious Disease, The John Curtin School of Medical Research, The Australian National University, Canberra ACT 2601, Australia.

<sup>2</sup> Sir William Dunn School of Pathology, Medical Sciences Division, University of Oxford, Oxfordshire OX1 3RE, UK.

<sup>3</sup> Department of Immunology and Microbial Disease, Albany Medical College, Albany, New York 12208, USA.

**Sup fig. 1: IL-4R $\alpha$  regulation does not occur in APCs nor is it inducible by IL-13 in T cells.**

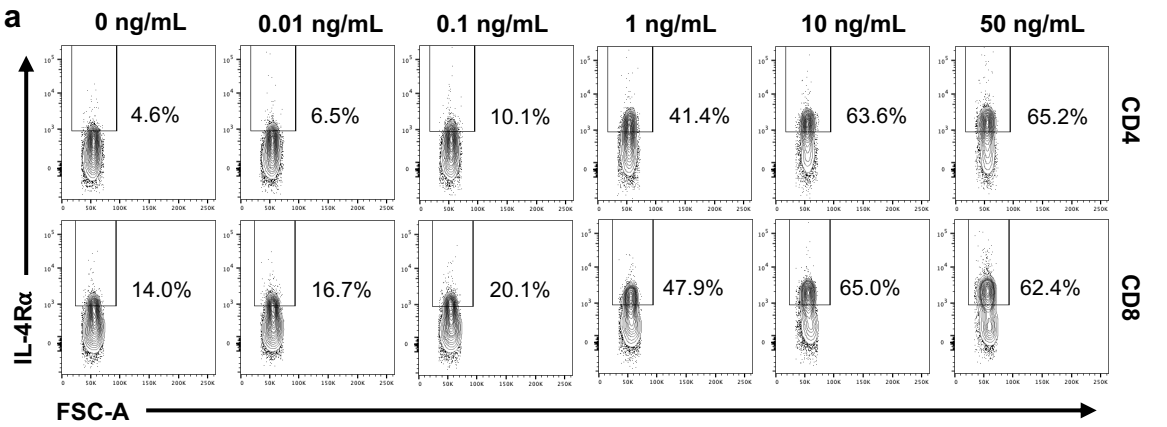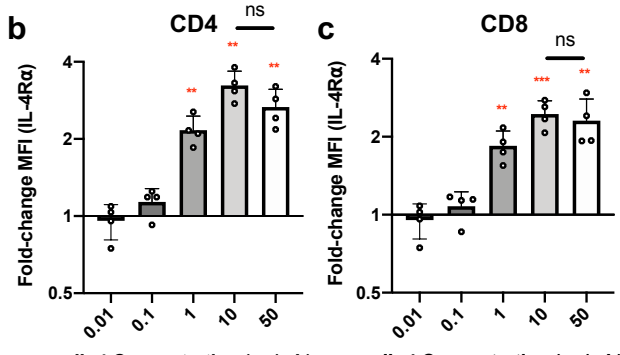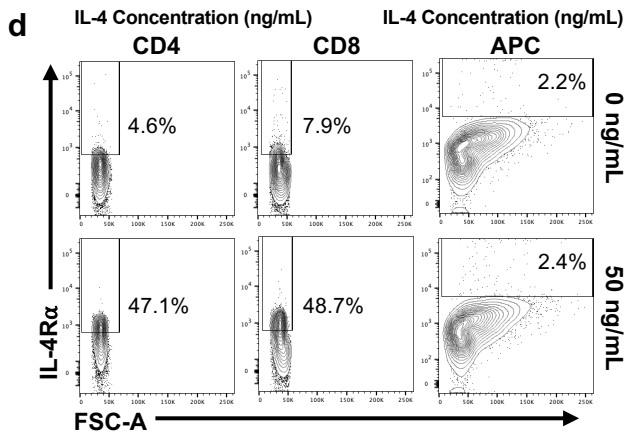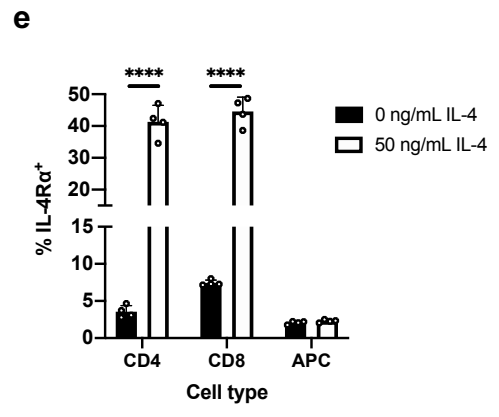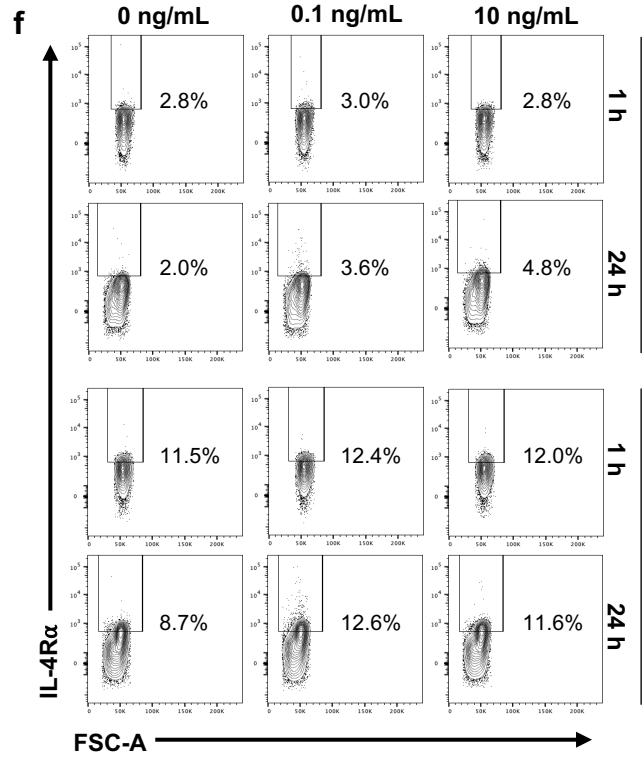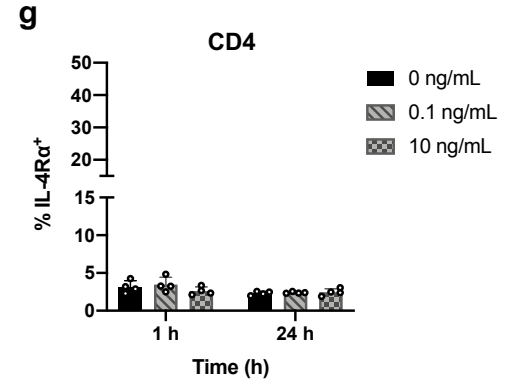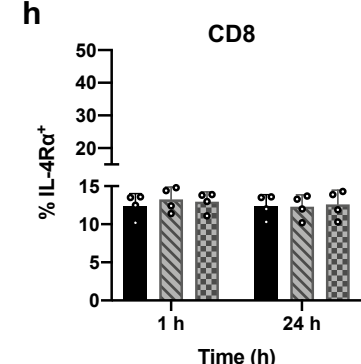

**Sup fig. 1: IL-4R $\alpha$  regulation does not occur in APCs nor is it inducible by IL-13 in T cells.**

**(a)** Whole spleen homogenate from naïve 6–8-week-old female BALB/c mice were stimulated with variable concentrations of IL-4 (0–50 ng/mL) *in vitro*. The expression of IL-4R $\alpha$  was evaluated on CD4 and CD8 T cells via flow cytometry. The fold-change in IL-4R $\alpha$ -associated MFI was compared, normalizing to the respective non-stimulated control **(b–c)**. **(d–e)** The percentage of cells deemed IL-4R $\alpha$ <sup>+</sup> following 24 h 50 ng/mL IL-4 stimulation were compared between T cell subsets and APCs. **(f)** Splenic homogenate was alternatively treated with 0.1 or 10 ng/mL of IL-13 *in vitro* for 1 or 24 h and IL-4R $\alpha$  expression was evaluated. The percentage of IL-4R $\alpha$ <sup>+</sup> cells among both **(g)** CD4 and **(h)** CD8 T cells following IL-13 stimulation. Data are represented as mean + SD, where dots represent biological replicates from a single experiment. The experiments were repeated at least twice. Two-way ANOVA combined with Tukey's post-hoc multiple comparison test was conducted to compare groups (black). Paired t-tests were conducted to evaluate the significance in fold-change (red), *p*-value denotations: 'ns' *p*  $\geq$  0.05, '\*\*' *p* < 0.05, '\*\*\*' *p* < 0.01, '\*\*\*\*' *p* < 0.001 and '\*\*\*\*\*' *p* < 0.0001.

**Sup fig. 2:  $\gamma$ c and IL-13R $\alpha$ 1 expression is low on CD4 and CD8 T cells and tends to downregulate upon IL-4 stimulation.**

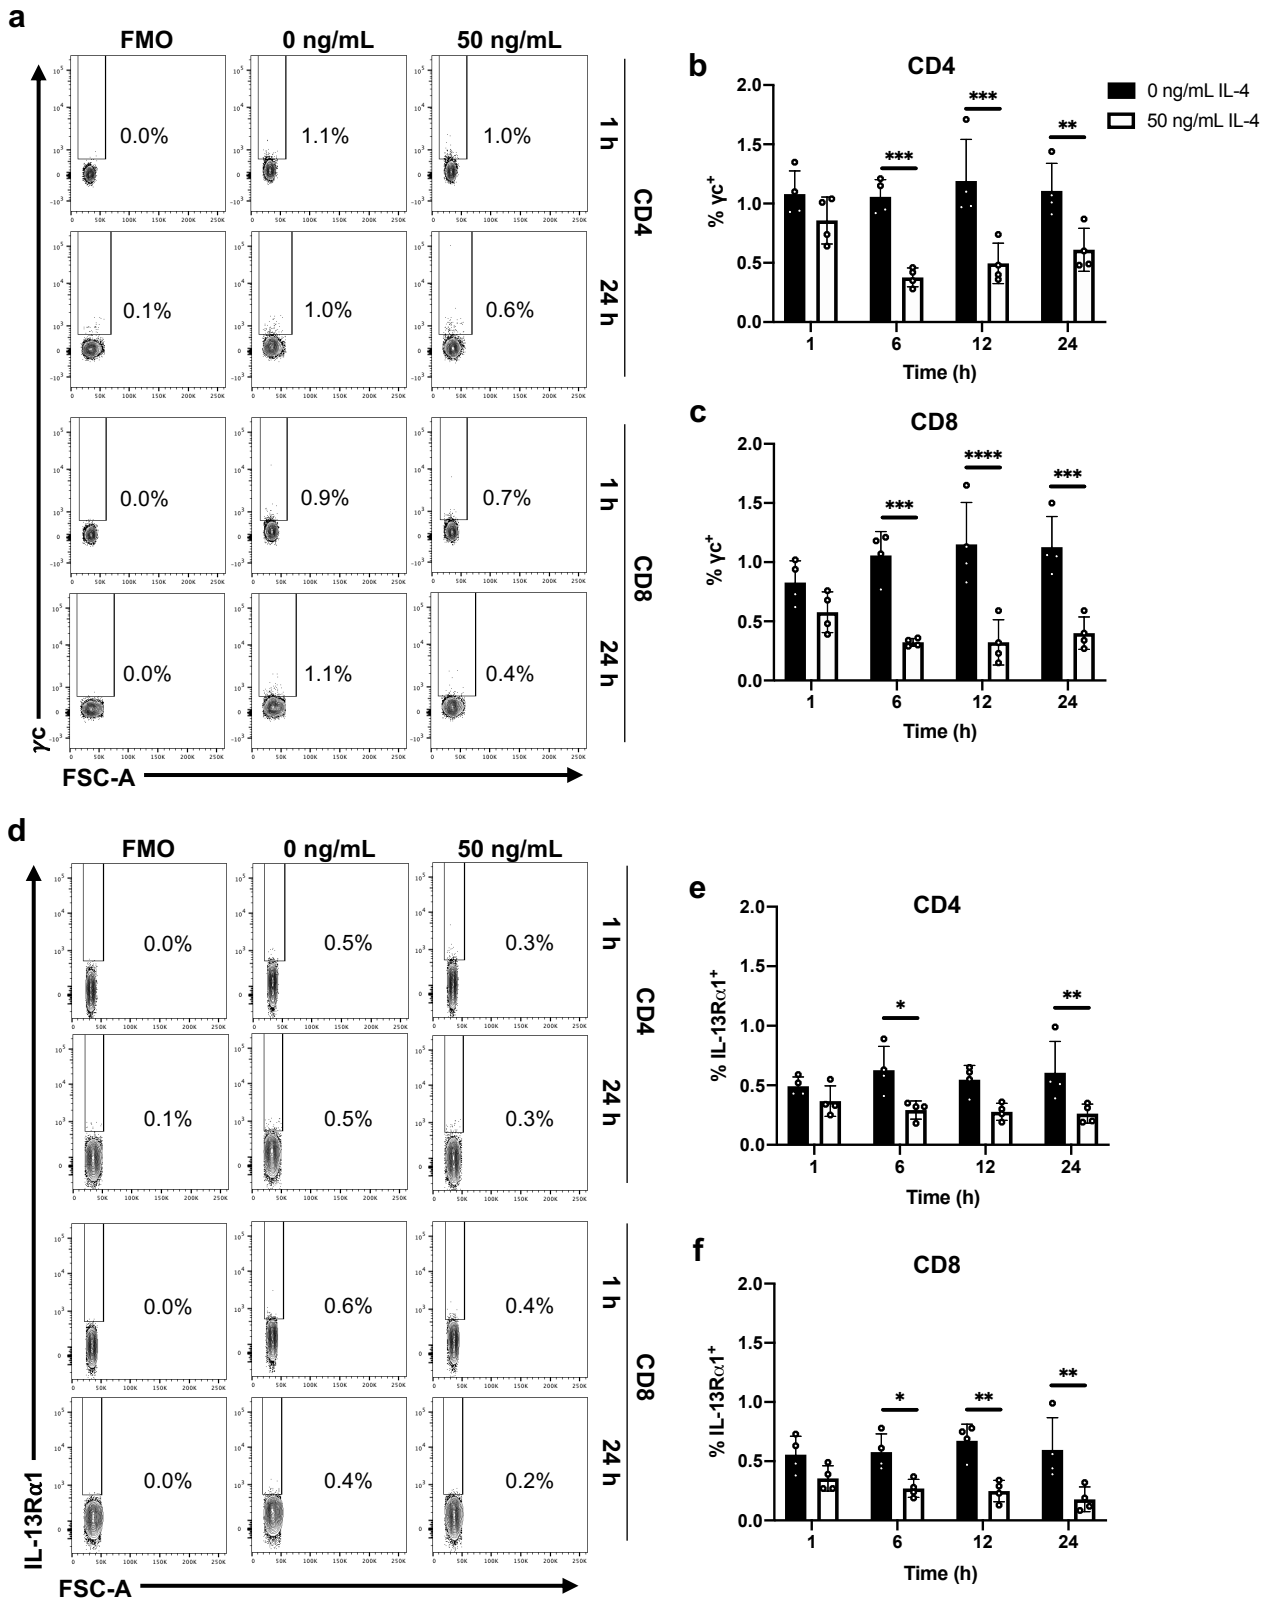

Whole spleen homogenate derived from naïve 6–8-week-old female BALB/c mice were stimulated with 50 ng/mL IL-4 *in vitro* for 1–24 h prior to flow cytometric analysis. **(a)** Representative contour plots showing the expression of  $\gamma$ c on pre-gated CD4 and CD8 T cells at both the early (1 h) and late (24 h) timepoints. The percentage of  $\gamma$ c<sup>+</sup> **(b)** CD4 and **(c)** CD8 T cells. The expression of IL-13R $\alpha$ 1 was similarly evaluated **(d–f)**. Data are represented as mean + SD, where dots represent biological replicates from a single experiment. The experiments were repeated at least twice. Two-way ANOVA combined with Tukey's post-hoc multiple comparison test was conducted to compare groups. *p*-value denotation: '\*' *p* < 0.05, '\*\*' *p* < 0.01, '\*\*\*' *p* < 0.001 and '\*\*\*\*' *p* < 0.0001.

**Sup fig. 3: IL-13R $\alpha$ 2 differentially regulated by IL-4 across sites.**

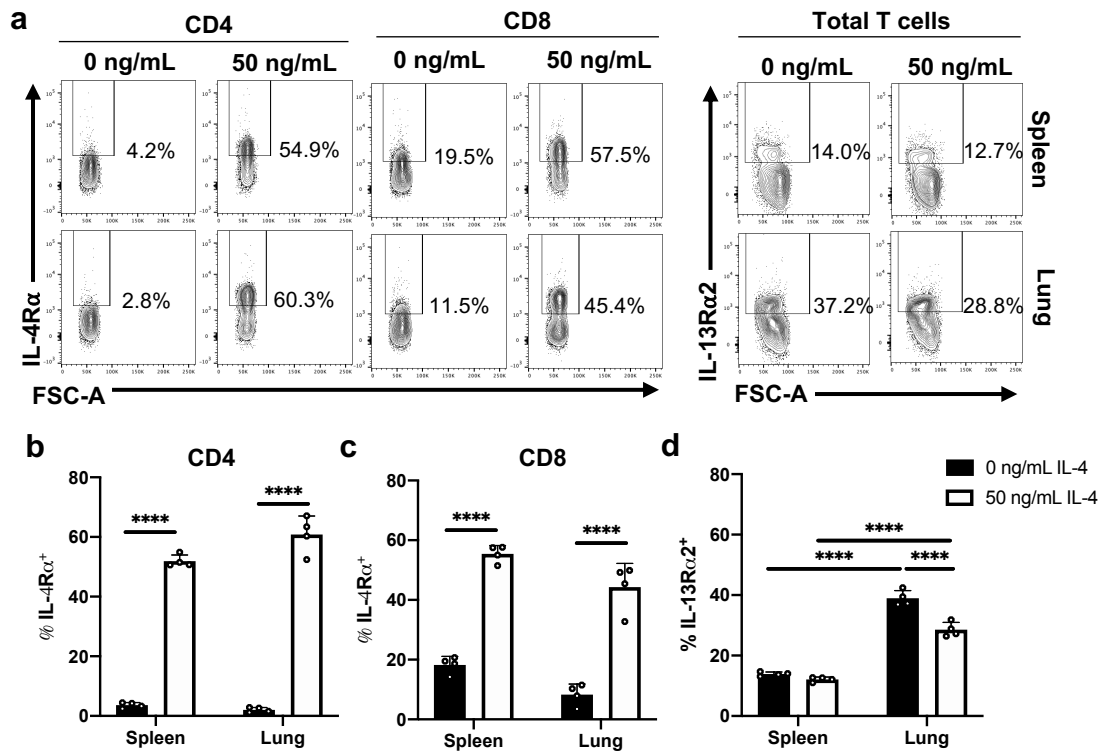

**(a)** Whole spleen or lung homogenate derived from naïve 6–8-week-old female BALB/c mice were stimulated with 50 ng/mL IL-4 *in vitro* for 24 h prior to flow cytometric analysis. Representative contour plots show the expression of IL-4R $\alpha$  on pre-gated CD4 and CD8 T cells, as well as IL-13R $\alpha$ 2 on total T cells following IL-4 stimulation. The percentage of cells deemed IL-4R $\alpha$ <sup>+</sup> following IL-4 stimulation on both **(b)** CD4 and **(c)** CD8 T cells. **(d)** Percentage of T cells deemed IL-13R $\alpha$ 2<sup>+</sup>. Data are represented as mean + SD, where dots represent biological replicates from a single experiment. The experiments were repeated at least twice. Two-way ANOVA combined with Tukey's post-hoc multiple comparison test was conducted to compare groups. *p*-value denotation: '\*\*\*\*', *p* < 0.0001.

Sup fig. 4: Sorted naïve CD4 T cells upregulate IL-4R $\alpha$  in presence of TCR stimulation.

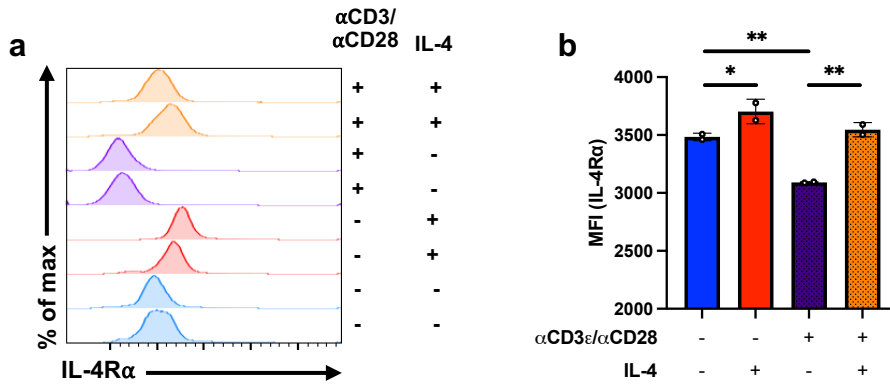

Single cell suspensions from 6–8-week-old female BALB/c mice were sorted by a two-step MACS process, first by negatively selecting CD4 T cells before subsequent positive selection of CD62L<sup>+</sup> cells. These isolated naïve CD4 T cells were stimulated with 50 ng/mL IL-4 *in vitro* for 24 h prior to flow cytometric analysis. **(a)** Representative histograms show the expression of IL-4R $\alpha$  on pre-gated CD4 T cells. **(b)** MFI of IL-4R $\alpha$  was compared between groups. Data are represented as mean + SD. Experiment was completed in duplicates. One-way ANOVA combined with a post-hoc Sidak test was used to compare groups. *p*-value denotation: ‘\*’ *p* < 0.05, ‘\*\*’ *p* < 0.01.

Sup fig. 5: Phosphorylation of STAT3 detected under high IL-4 concentrations.

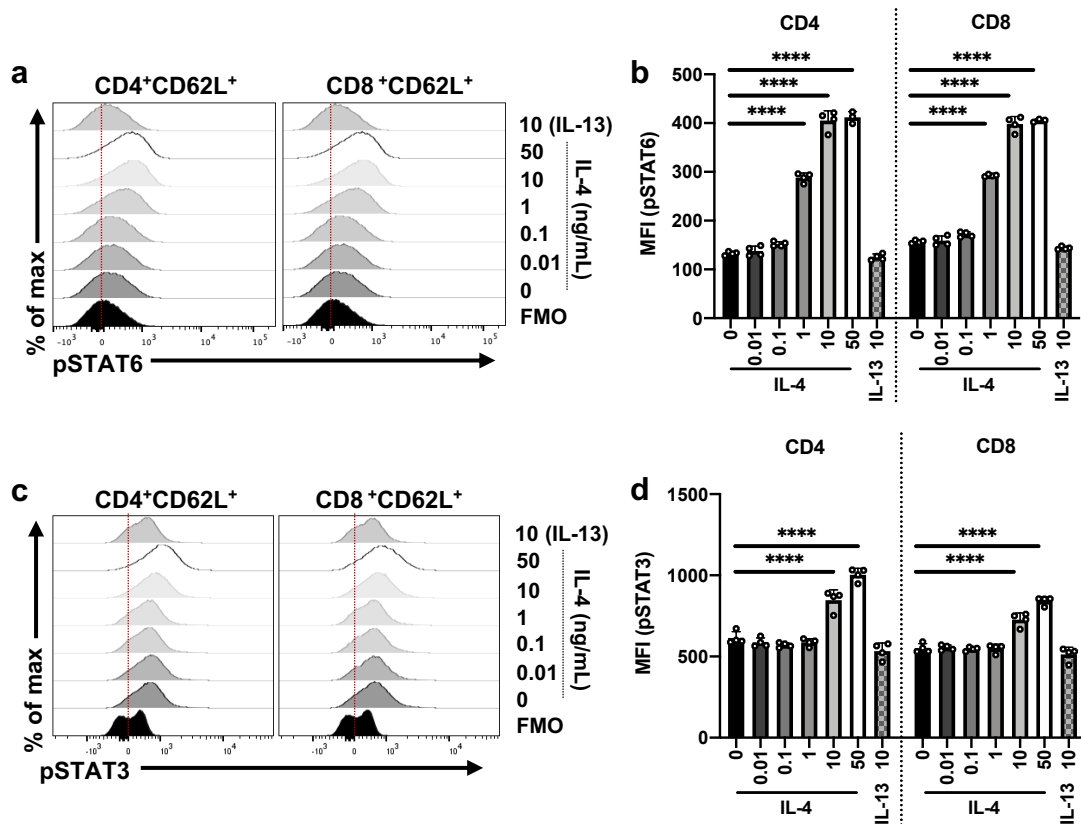

Whole spleen homogenate derived from naïve 6–8-week-old female BALB/c mice was treated with 0.01–50 ng/mL IL-4 or 10 ng/mL IL-13 for 24 h. **(a)** Representative histogram showing pSTAT6 expression among CD62L<sup>+</sup> T cells. **(b)** MFI (pSTAT6) with respect to cytokine stimulation among CD62L<sup>+</sup> cells. pSTAT3 was also evaluated under different cytokine concentrations **(c–d)**. Data are represented as mean + SD, where dots represent biological replicates from a single experiment. The experiments were repeated at least twice. Two-way ANOVA combined with Tukey’s post-hoc multiple comparison test was conducted to compare groups. *p*-value denotation: ‘\*\*\*’ *p* < 0.001 and ‘\*\*\*\*’ *p* < 0.0001.

**Sup fig. 6: TGF- $\beta$ 1 expression regulated by IL-4 in a CD62L:CD44 status-dependent manner and IL-6 fails to elicit receptor upregulation.**

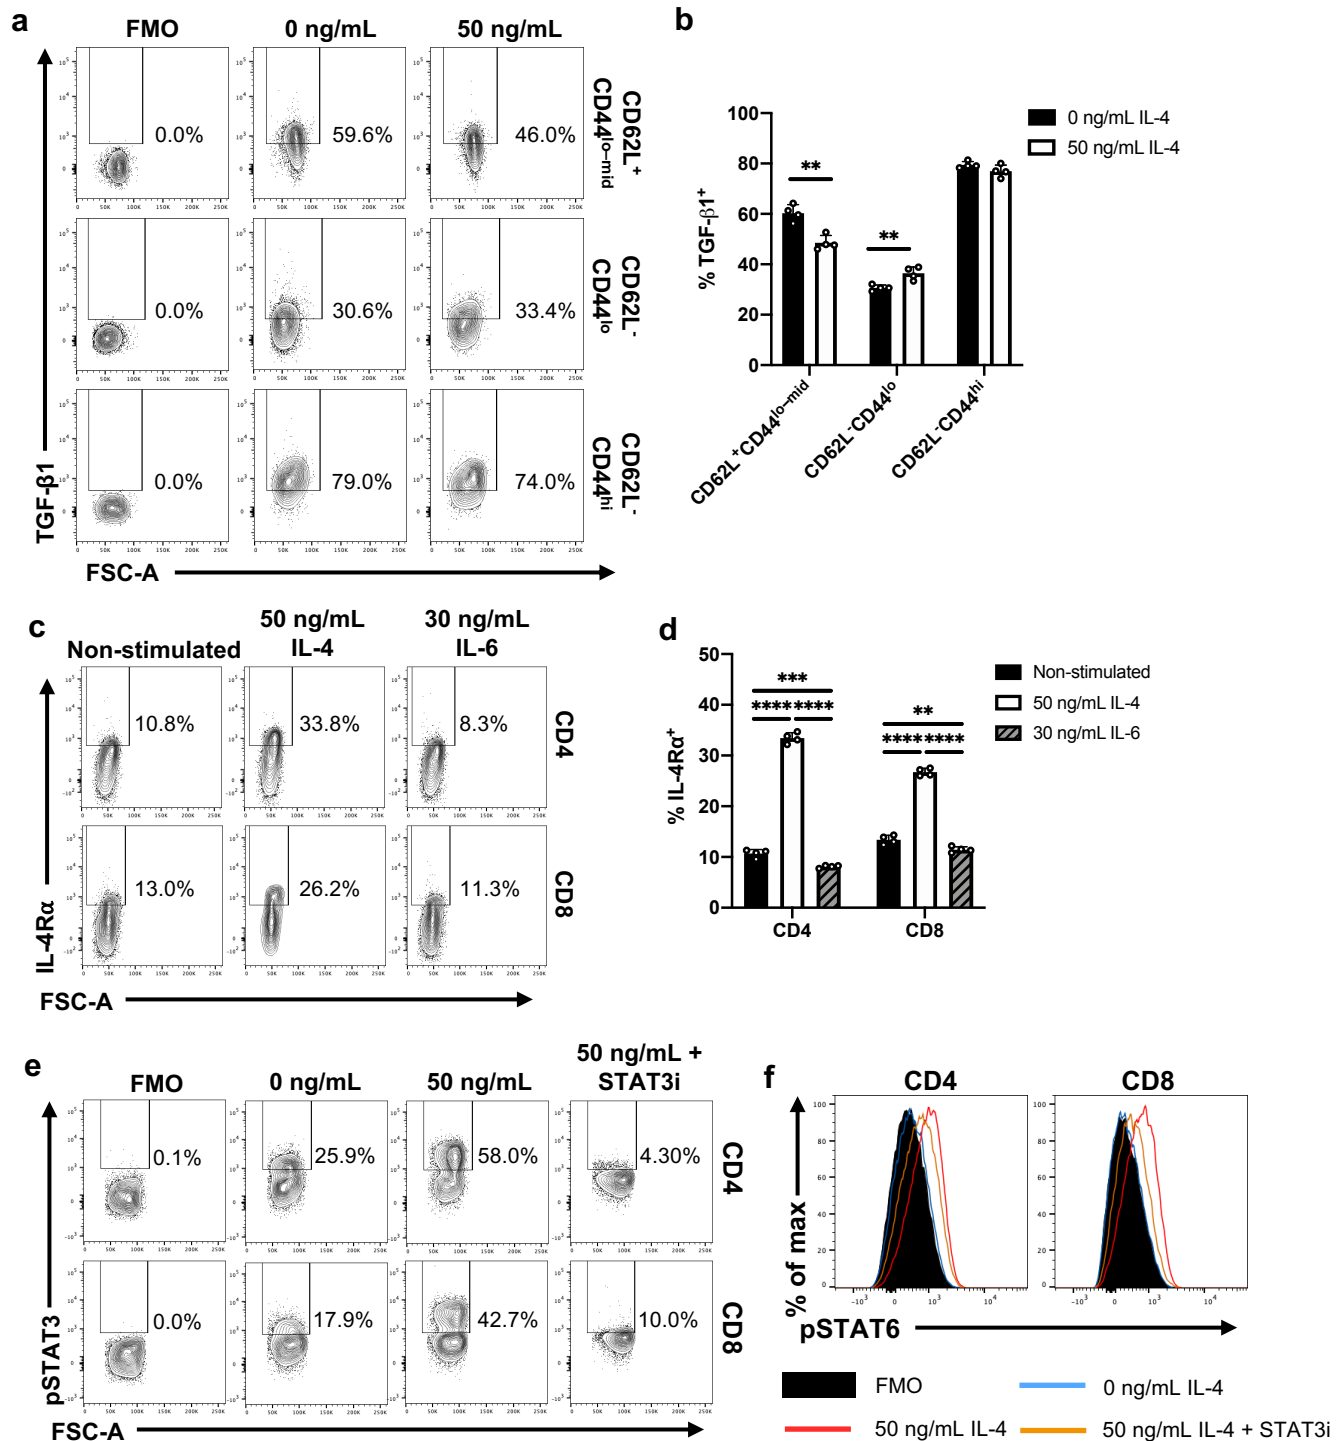

(a) Whole spleen homogenate derived from naïve 6–8-week-old female BALB/c mice were stimulated with 50 ng/mL IL-4 *in vitro* for 24 h. Representative contour plots showing the expression of TGF- $\beta$ 1 with respect to CD62L:CD44 statuses among pre-gated CD4 T cells. (b) The percentage of CD4 TGF- $\beta$ 1<sup>+</sup>. (c) Splenic homogenate was alternatively treated with 30 ng/mL IL-6 for 24 h. Representative contour plots. (d) The percentage of IL-4R $\alpha$ <sup>+</sup> cells. (e–f) Splenic homogenate was pre-incubated with STAT3 and/or STAT6 inhibitors prior to IL-4 stimulation. The phosphorylation statuses were subsequently evaluated, with representative contour plots/histograms shown. Data are represented as mean + SD, where dots represent biological replicates from a single experiment. The experiments were repeated twice. Two-way ANOVA combined with Tukey’s post-hoc multiple comparison test was conducted to compare groups. *p*-value denotation: ‘\*\*\*’ *p* < 0.01, ‘\*\*\*\*’ *p* < 0.001 and ‘\*\*\*\*\*’ *p* < 0.0001.



Sup fig. 7: Binary analyses of Fluidigm expression profiles and qPCR validation.

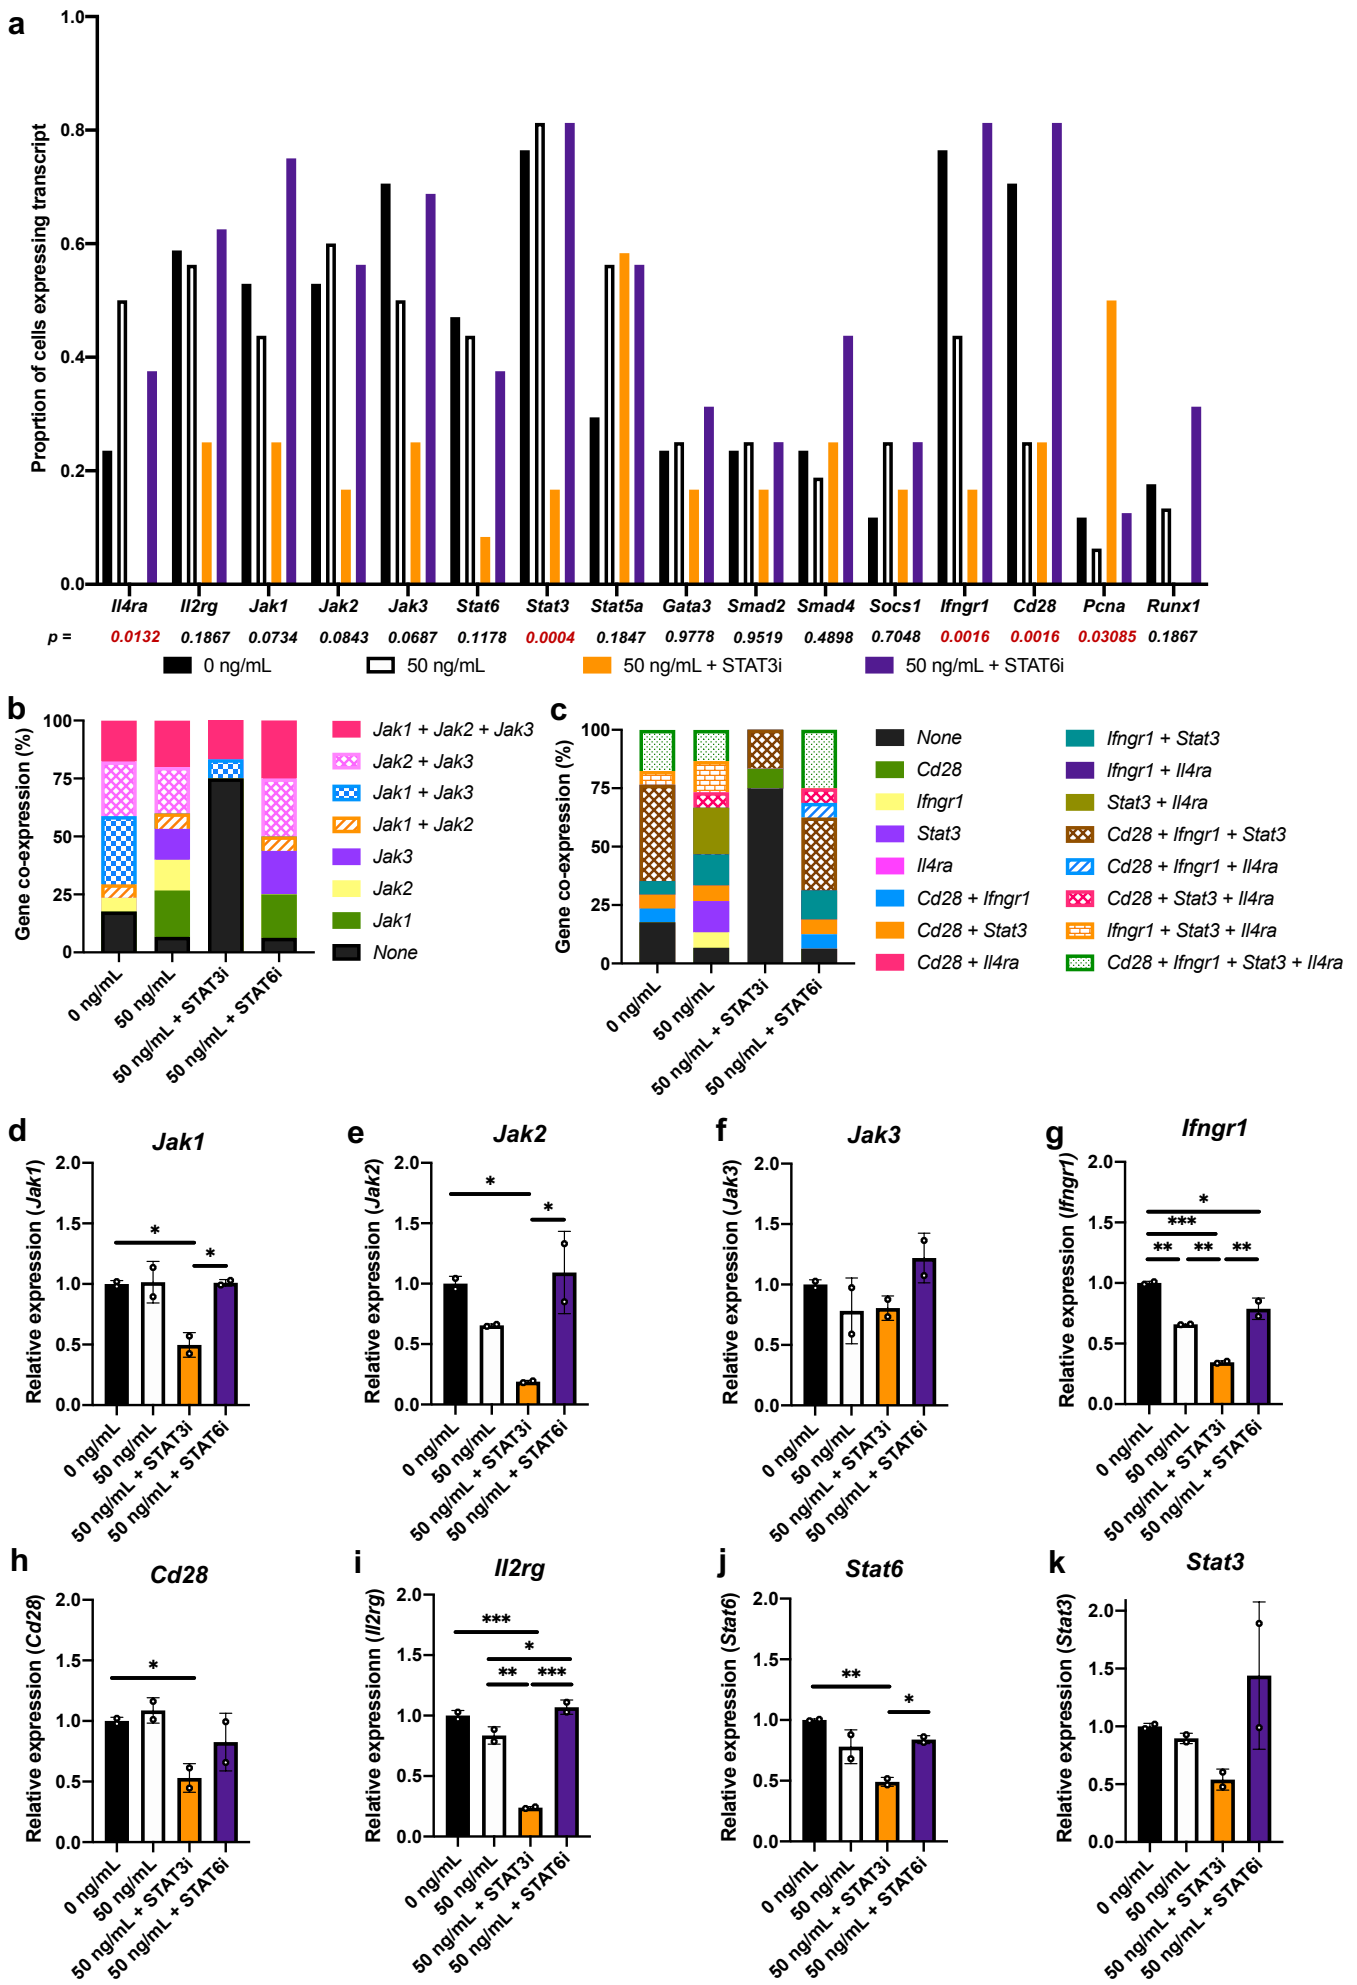

### Sup fig 7: Binary analyses of Fluidigm expression profiles and qPCR validation.

Whole spleen homogenate derived from naïve 6–8-week-old female BALB/c mice were pre-incubated with STAT3i or STAT6i *in vitro* for 3 h prior to stimulation with 50 ng/mL IL-4 for 24 h. Fluidigm Biomark 48.48 analyses were performed on single CD3<sup>+</sup>CD4<sup>+</sup>CD8<sup>-</sup>IL-4R $\alpha$ <sup>+</sup> cells, evaluating transcript expression of genes-of-interest. **(a)** For genes expressed by at least 15% of all cells, dichotomised expression was evaluated. To evaluate whether the proportion of transcript expression was contingent on treatment, Fisher's exact tests were conducted, where  $p < 0.05$  denoted in red. **(b)** Gene co-expression was considered among Jak family members. **(c)** Co-expression profiles of markers-of-interest. The experiment was repeated twice, pooling the data.  $n \sim 15$  cells per group. RT-qPCR was performed on 100 sorted CD3<sup>+</sup>CD4<sup>+</sup>CD8<sup>-</sup>IL-4R $\alpha$ <sup>+</sup> cells, evaluating transcripts of select markers: **(d)** *Jak1*, **(e)** *Jak2*, **(f)** *Jak3*, **(g)** *Ifn $\gamma$ 1*, **(h)** *Cd28*, **(i)** *yc*, **(j)** *Stat6* and **(k)** *Stat3*. The experiment was completed in duplicates. ANOVA combined with a post-hoc multiple comparison test was conducted to compare groups.  $p$ -value denotations: '\*'  $p < 0.05$ , '\*\*'  $p < 0.01$  and '\*\*\*'  $p < 0.001$ .

**Sup fig. 8: Clustering analyses.**

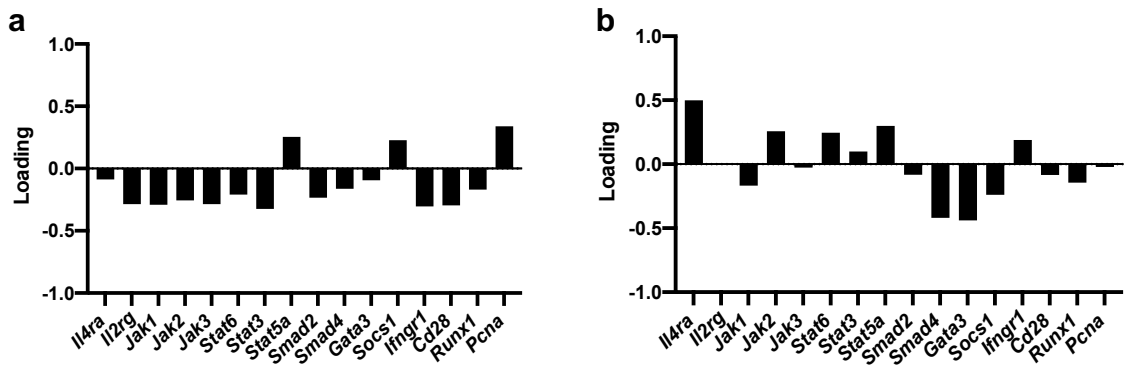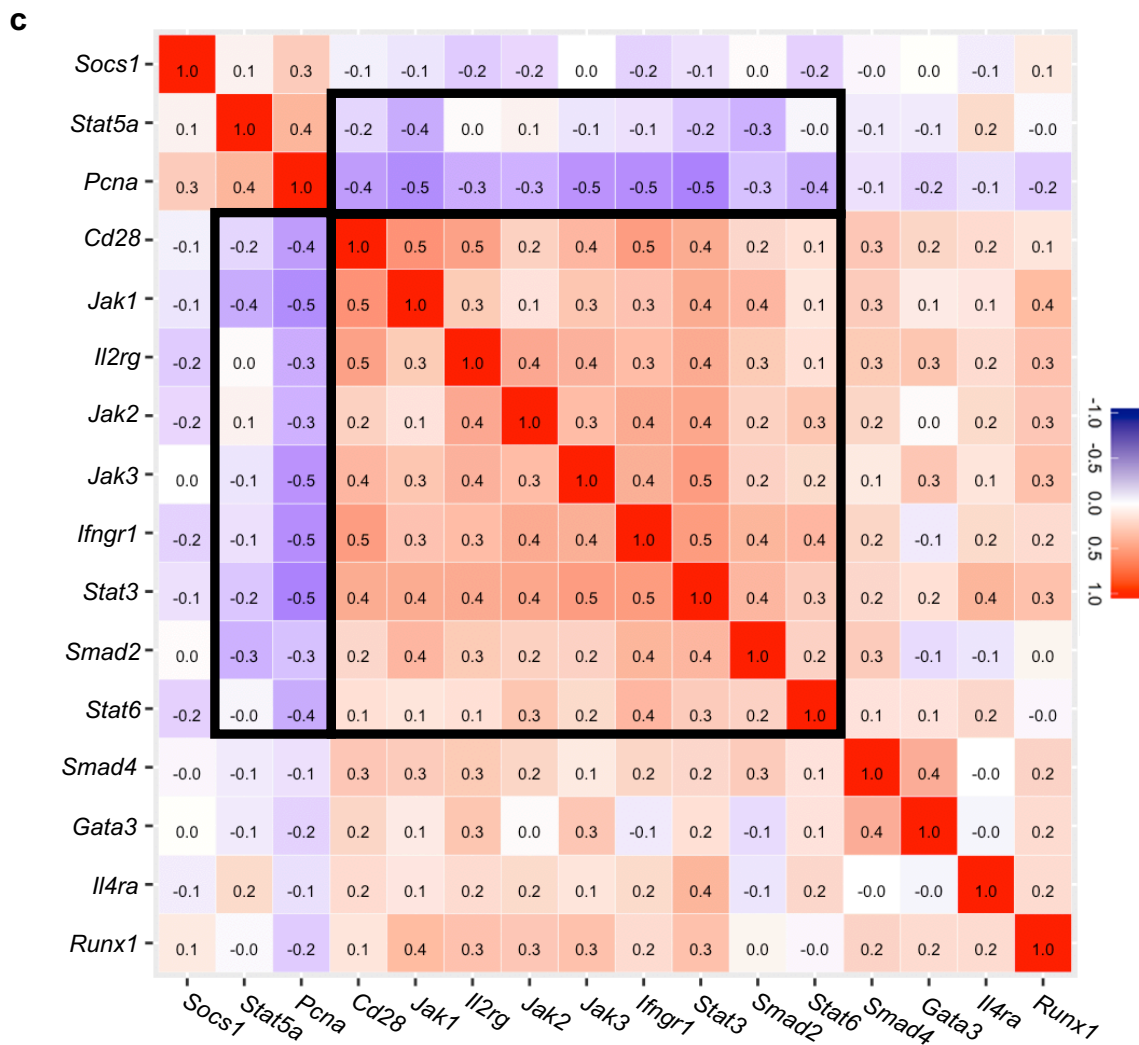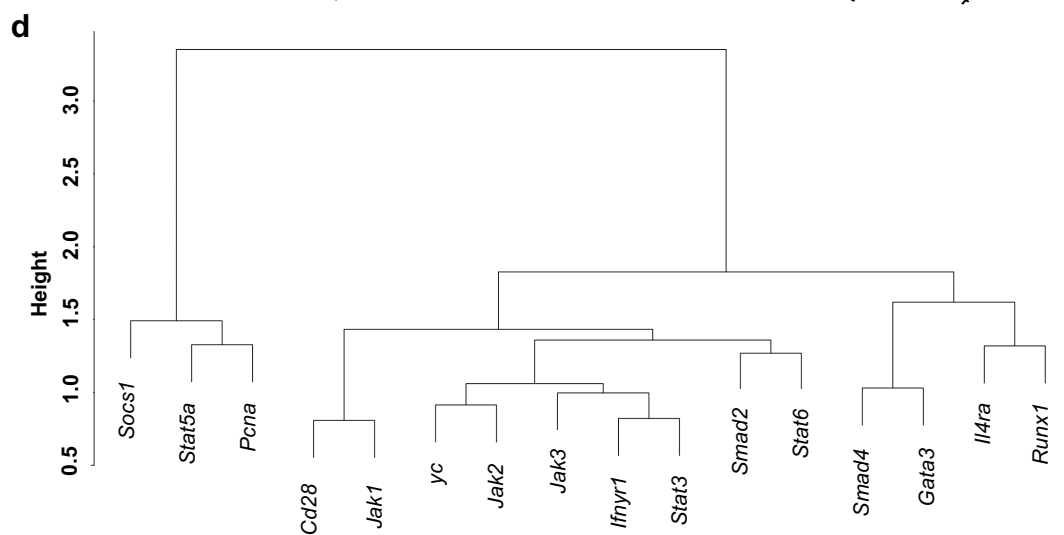

### **Sup fig 7: Clustering analyses.**

Whole spleen homogenate derived from naïve 6–8-week-old female BALB/c mice were pre-incubated with STAT3i or STAT6i *in vitro* for 3 h prior to stimulation with 50 ng/mL IL-4 for 24 h. Fluidigm Biomark 48.48 analyses were performed on single CD3<sup>+</sup>CD4<sup>+</sup>CD8<sup>-</sup>IL-4R $\alpha$ <sup>+</sup> cells, evaluating transcript expression of genes-of-interest. For genes expressed by at least 15% of cells, clustering analyses were performed. PCA was conducted, with loadings for both **(a)** PC1 and **(b)** PC2. **(c)** Spearman's rank correlation analysis was performed to evaluate correspondence of genes pairwise. **(d)** Dendrogram is based on the similarity in gene expression.

# Sup fig. 9: Flow cytometry gating strategies

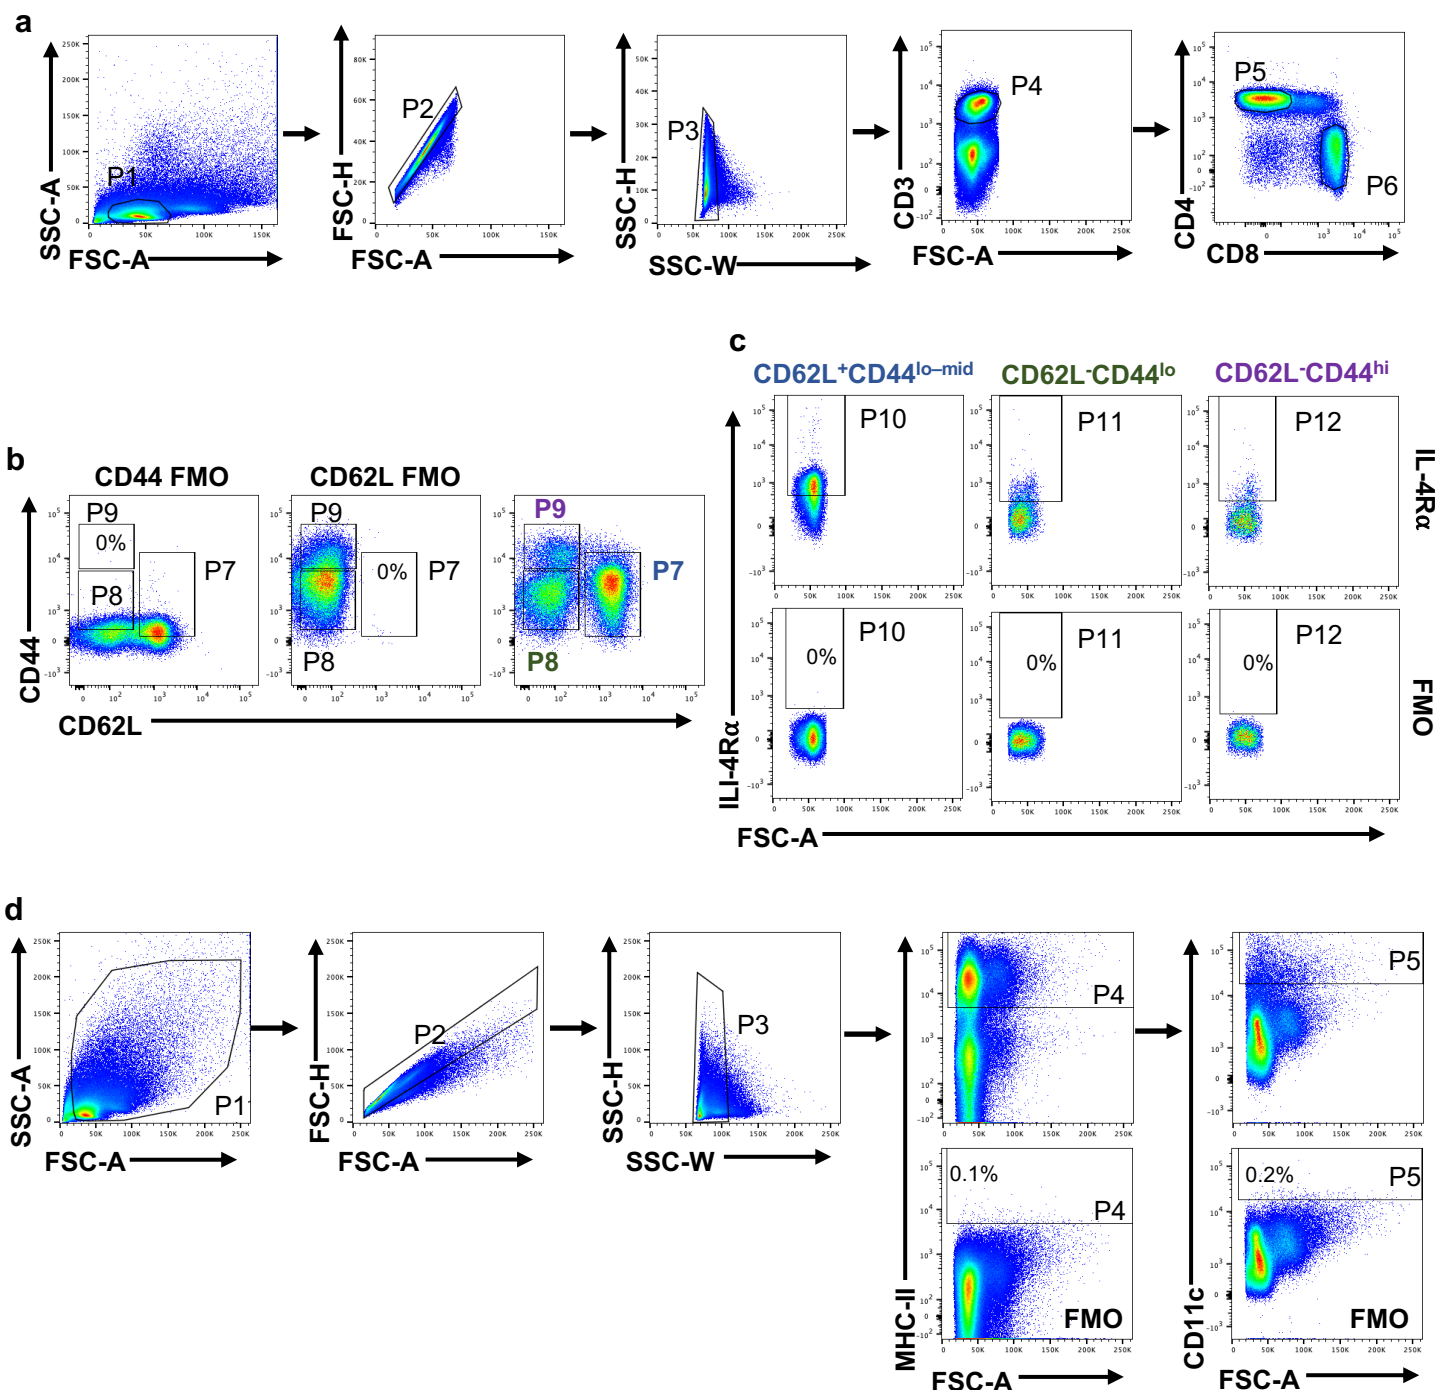

**(a)** CD4 and CD8 T cells were evaluated by first selecting the lymphocyte population based on FSC-A:SSC-A (P1). This was followed by a two-step doublet discrimination process based on FSC and SSC proportionality (P2; P3). Total T cells were selected according to their CD3 status (P4). CD4 and CD8 T cell subsets were subsequently discerned using the CD4:CD8 bivariate plot (P5; P6). **(b)** Following CD4 and CD8 T cell gating, cells were identified according to their CD62L:CD44 status (the CD4 subset shown here). CD62L<sup>+</sup>CD44<sup>lo-mid</sup> (P7), CD62L<sup>-</sup>CD44<sup>lo</sup> (P8) and CD62L<sup>-</sup>CD44<sup>hi</sup> (P9) according to the respective CD62L and CD44 FMOs. **(c)** Different markers (e.g. IL-4R $\alpha$ ) were subsequently evaluated, according to the relevant FMOs (P10–12). **(d)** APCs were similarly evaluated by first discriminating on the bases of size and granularity (P1), prior to doublet discrimination (P2, P3). MHC-II<sup>+</sup> (P4) followed by CD11c<sup>hi</sup> (P5) events were selected according to their respective FMOs.

Sup fig. 10: ImageStream single-colour controls and gating strategy

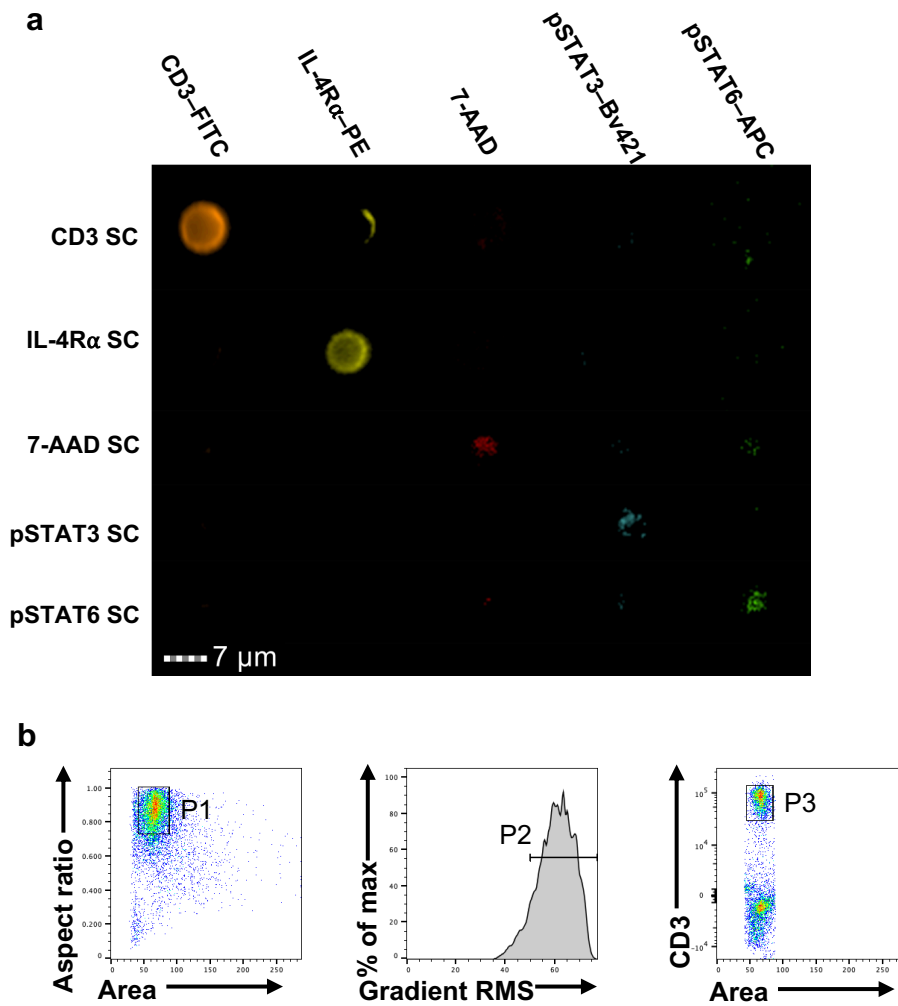

Whole spleen homogenate harvested from naïve WT BALB/c mice were stimulated *in vitro* with 50 ng/mL IL-4 for 24 h prior to ImageStream analysis. **(A)** Single-colour controls were evaluated to set the compensation matrix and to consider spectral overlap. Note that cells were fixed, allowing 7-AAD to be used as a nuclear stain (and is, therefore, not indicative of viability). **(B)** Events were first discriminated based on the area (indicative of event size, as derived from the brightfield channel) and aspect ratio (associated with event circularity and thus can be used to exclude doublets) (P1). High event/flow rate results in cells going out of focus; to ensure that only in-focus events are included in the analysis, gradient RMS was used (P2). Finally, total T cells were selected based on event CD3 status (P3)

**Sup table. 1: Assay probes.**

| Gene symbol    | Encoded protein                             | Assay ID       | Amplicon length (bp) | Reference sequence                                             |
|----------------|---------------------------------------------|----------------|----------------------|----------------------------------------------------------------|
| <i>Il4</i>     | IL-4                                        | Mm00445259_m1  | 79                   | NM_021283.2                                                    |
| <i>Il13</i>    | IL-13                                       | Mm00434204_m1  | 56                   | NM_008255.3                                                    |
| <i>Il2</i>     | IL-2                                        | Mm_00434256_m1 | 82                   | NM_032392.1                                                    |
| <i>Il6</i>     | IL-6                                        | Mm_00446190_m1 | 78                   | NM_031168.1                                                    |
| <i>Il10</i>    | IL-10                                       | Mm01288386_m1  | 136                  | NM_010548.2                                                    |
| <i>Il17a</i>   | IL-17A                                      | Mm00434214_m1  | 97                   | NM_008359.2                                                    |
| <i>Il18</i>    | IL-18                                       | Mm00434226_m1  | 141                  | NM_008360.1                                                    |
| <i>Tgfb1</i>   | Transforming growth factor beta 1           | Mm01178820_m1  | 59                   | NM_011577.2                                                    |
| <i>Ifng</i>    | Interferon gamma                            | Mm01168134_m1  | 100                  | NM_008337.3                                                    |
| <i>Il4ra</i>   | IL-4 receptor alpha                         | Mm0275139_m1   | 61                   | NM_001008700.3                                                 |
| <i>Il2rg</i>   | $\gamma$ common chain                       | Mm0044285_m1   | 65                   | AK143669.1                                                     |
| <i>Il13ra1</i> | IL-13 receptor alpha 1                      | Mm01302068_m1  | 103                  | AK080147.1                                                     |
| <i>Il13ra2</i> | IL-13 receptor alpha 2                      | Mm00515166_m1  | 105                  | AK089687.2                                                     |
| <i>Tgfb1r1</i> | Transforming growth factor beta receptor 1  | Mm00436964_m1  | 85                   | NM_009379.2                                                    |
| <i>Il17ra</i>  | IL-17 receptor A                            | Mm00434214_m1  | 97                   | NM_008359.2                                                    |
| <i>Il17rb</i>  | IL-17 receptor B                            | Mm00444709_m1  | 90                   | NM_019583.3                                                    |
| <i>Il17rc</i>  | IL-17 receptor C                            | Mm00506606_m1  | 58                   | NM_598920.3; NM_178942.1                                       |
| <i>Ifngr1</i>  | Interferon-gamma receptor 1                 | Mm00599890_m1  | 85                   | NM_010511.2                                                    |
| <i>Stat6</i>   | STAT6                                       | Mm01160477_m1  | 76                   | NM_009284.2                                                    |
| <i>Stat3</i>   | STAT3                                       | Mm01219775_m1  | 75                   | NM_011486.4; NM_213659.2;<br>NM_213660.2                       |
| <i>Stat1</i>   | STAT1                                       | Mm01257286_m1  | 75                   | NM_009283.4; NM_001205314.1;<br>NM_001205313.1                 |
| <i>Stat5a</i>  | STAT5a                                      | Mm03053818_s1  | 59                   | NM001164062.1; NM_011488.3                                     |
| <i>Socs1</i>   | Suppressor of cytokine signalling (SOCS)1   | Mm00782550_s1  | 88                   | NM001271603.1; NM_009896.2                                     |
| <i>Socs3</i>   | SOCS3                                       | Mm00545913_s1  | 76                   | NM_007707.3                                                    |
| <i>Irs1</i>    | Insulin receptor substrate 1                | Mm01278327_m1  | 69                   | NM_010570.4                                                    |
| <i>Irs2</i>    | Insulin receptor substrate 2                | Mm03038438_m1  | 63                   | NM_001081212.1                                                 |
| <i>Jak1</i>    | Janus kinase 1                              | Mm00600614_m1  | 72                   | NM_146145.2                                                    |
| <i>Jak2</i>    | Janus kinase 2                              | Mm01208489_m1  | 62                   | NM_001048177.2; NM_008413.3                                    |
| <i>Jak3</i>    | Janus kinase 3                              | Mm00439973_m1  | 66                   | NM_001190830.1; NM_010589.6                                    |
| <i>Smad2</i>   | SMAD family member 2                        | Mm00487530_m1  | 72                   | NM_001252481.1; NM_010754.5                                    |
| <i>Smad4</i>   | SMAD family member 4                        | Mm03023996_m1  | 71                   | NM_008540.2                                                    |
| <i>Cd4</i>     | Helper T cell marker                        | Mm00442754_m1  | 78                   | NM_013488.2                                                    |
| <i>Cd8a</i>    | Cytotoxic T cell marker                     | Mm01182107_g1  | 68                   | NM_001081110.2; NM_009857.1                                    |
| <i>Cd28</i>    | T cell co-stimulatory molecule              | Mm01253994_m1  | 98                   | NM_001081110.2; NM_009857.1                                    |
| <i>Ctla4</i>   | Cytotoxic T-lymphocyte-associated protein 4 | Mm00486849_m1  | 71                   | NM_001281976.1; NM_009843.3                                    |
| <i>Gata3</i>   | GATA3                                       | Mm00484683_m1  | 57                   | NM_008091.3                                                    |
| <i>Rorc</i>    | RAR-related orphan receptor gamma           | Mm00484683_m1  | 54                   | NM_001293734.1                                                 |
| <i>Runx1</i>   | Runt-related transcription factor 1         | Mm01213404_m1  | 81                   | NM_001111021.2; NM_001111022.2;<br>NM_001111023.2; NM_009821.3 |
| <i>Pcna</i>    | Proliferating cell nuclear antigen (PCNA)   | Mm05873628_g1  | 72                   | NM_011045.2                                                    |
| <i>c-Maf</i>   | c-Maf                                       | Mm02581355_s1  | 154                  | NM_001020748.2                                                 |
| <i>L32</i>     | 60S Ribosomal protein                       | Mm02524691_s1  | 84                   | NM_018754.2                                                    |
| <i>Eef2</i>    | Eukaryote elongation factor 2               | Mm01171435_gH  | 74                   | NM_007907.2                                                    |
